# Supplementary material
Source: Research Square preprint supplement (doi:10.21203/rs.3.rs-10309995/v1)

**Hybrid Explainable AI for Early Sepsis Prediction with Actionable Lead Time and Clinical Utility Validation**

**Keya Dobriyal**

## ****Ensemble based Machine Learning for prediction of Sepsis – Process Summary****

The methodology and results for sepsis prediction, as implemented in the provided notebook, follow a comprehensive clinical machine learning pipeline. The approach focuses on early detection (a 6-hour lead time) while balancing model performance with clinical utility.

### 1. Detailed Methodology

The methodology is structured into five distinct phases: data engineering, model optimization, ensemble construction, clinical auditing, and interpretability.

#### A. Data Preparation and Feature Engineering

The model utilizes the PhysioNet sepsis dataset, with a focus on creating clinically relevant temporal features:

**Target Definition (6-Hour Lead Time):** The model is trained to predict sepsis 6 hours before clinical onset. The target variable, Clinical_Target, is a binary indicator that combines the current sepsis status with a 6-hour look-ahead (Lead_Target).

**Clinical Indices:** Calculation of physiological markers including:

**Shock Index:** $HR / SBP$, used to assess hemodynamics.

**ROX Index:** $(O2Sat / FiO2) / Resp$, used to evaluate respiratory failure risk.

**Temporal Features:**

**Lagged Features:** Sepsis history at intervals (3h, 6h, ..., 48h) to capture patient trajectory.

**Z-Score Normalization:** Normalizing vitals (HR, MAP, Temp, etc.) per patient to identify deviations from their individual baseline.

**Trajectory Slopes:** Calculating the 6-hour difference in Z-scores to capture the "rate of change" in patient health.

#### B. Model Architecture and Hyperparameter Tuning

The system employs a **Hybrid Ensemble** approach:

**Models:** Three gradient-boosting frameworks are used: **XGBoost**, **LightGBM**, and **CatBoost**.

**Optimization (Optuna):** Bayesian optimization is used to tune hyperparameters (learning rate, depth, estimators) over 10 trials per model. The objective function maximizes **Average Precision (AUPRC)** to handle the class imbalance inherent in sepsis data.

**Validation:** 5-fold **GroupKFold** cross-validation ensures that all data from a single patient remains in the same fold, preventing data leakage.

#### C. Clinical Audit Framework

Unlike standard ML pipelines, this methodology includes a "Clinical Audit" to assess real-world viability:

**Threshold Optimization:** The decision threshold is tuned to achieve a **75% Recall (Sensitivity)**, prioritizing the detection of most sepsis cases.

**Clinical Metrics:** Evaluates **ROC-AUC**, **AUPRC**, **Brier Score**, **Alarms per Day** and the **Number Needed to Evaluate (NNE)**—the number of patients a clinician must check to find one true sepsis case.

### 2. Results

The Hybrid Ensemble demonstrated robust performance, successfully balancing high sensitivity with a manageable clinical alarm burden.

#### Model Performance Comparison

| **Metric** | **XGBoost** | **LightGBM** | **CatBoost** | **Hybrid Ensemble** |
| --- | --- | --- | --- | --- |
| **ROC-AUC** | 0.9044 | 0.8975 | 0.8881 | **0.9029** |
| **AUPRC** | 0.6021 | 0.5966 | 0.5909 | **0.6053** |
| **Brier Score** | 0.0148 | 0.0149 | 0.0150 | **0.0159** |

#### Clinical Impact (Hybrid Ensemble)

At the optimized threshold for 75% sensitivity, the hybrid model yielded the following results:

**Sensitivity (Recall):** 75.00% (Detects 3 out of 4 sepsis cases 6 hours in advance).

**Precision (PPV):** 15.79% (Approximately 1 in 6 alarms is a true positive).

**Negative Predictive Value (NPV):** 99.17% (High confidence in "rule-out" scenarios).

**Clinical Burden:** 3.29 Alarms per patient per day.

**NNE:** 6.33 (A clinician evaluates ~6 patients per true sepsis case identified).

### 3. Advanced Analysis & Interpretability

**SHAP Analysis:** Used to identify that physiological trajectories (slopes) and the ROX index were among the most influential predictors.

**Survival Analysis:** A **Cox Proportional Hazards** model was integrated to analyze the time-to-sepsis, providing a probabilistic risk score over the duration of the ICU stay.

**Decision Curve Analysis (DCA):** The methodology included net benefit calculations to ensure the model provides more clinical utility than "treat all" or "treat none" strategies across various risk thresholds.


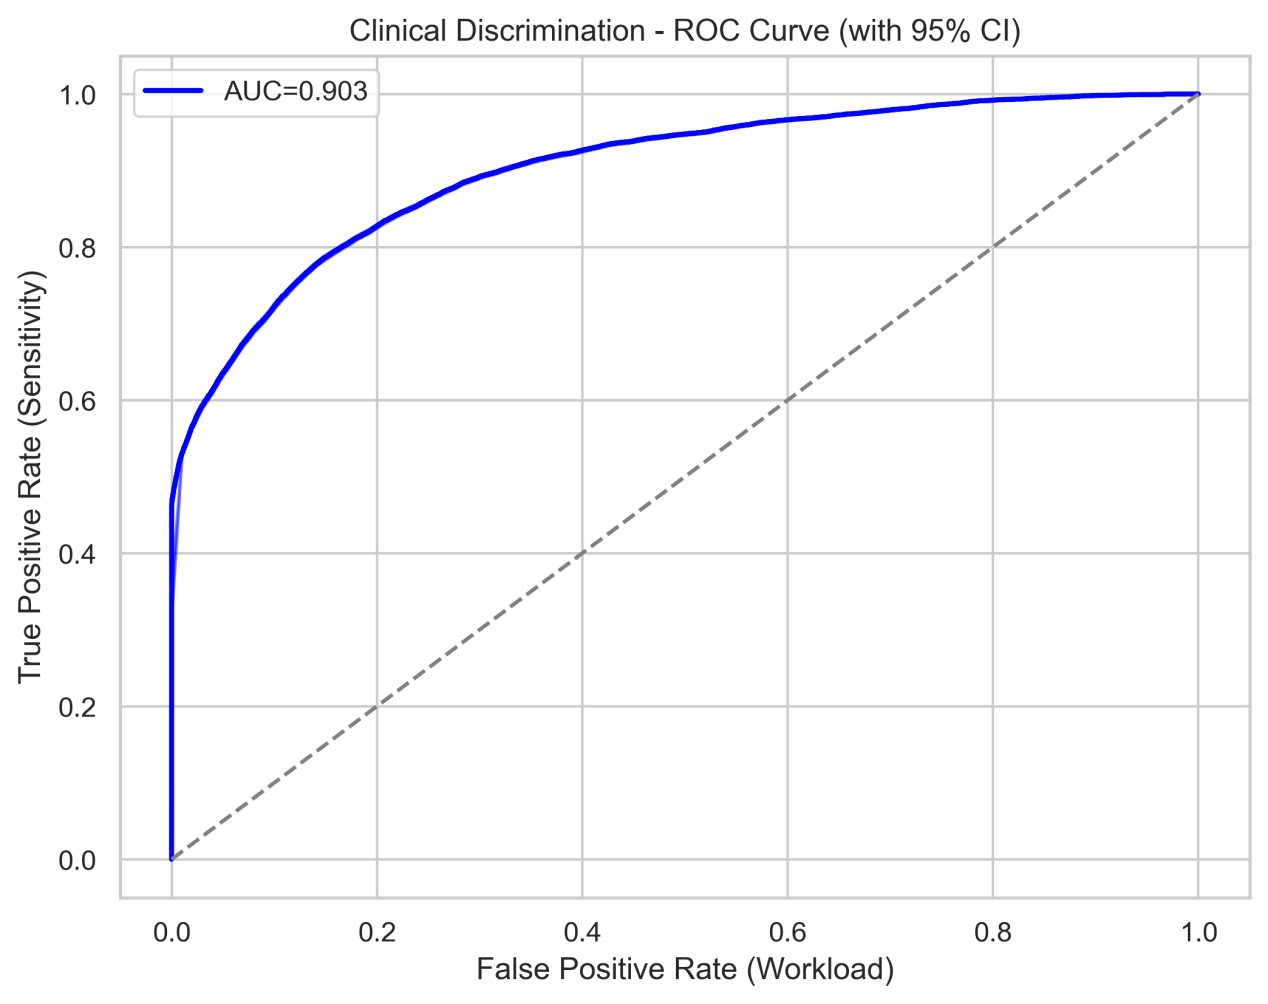

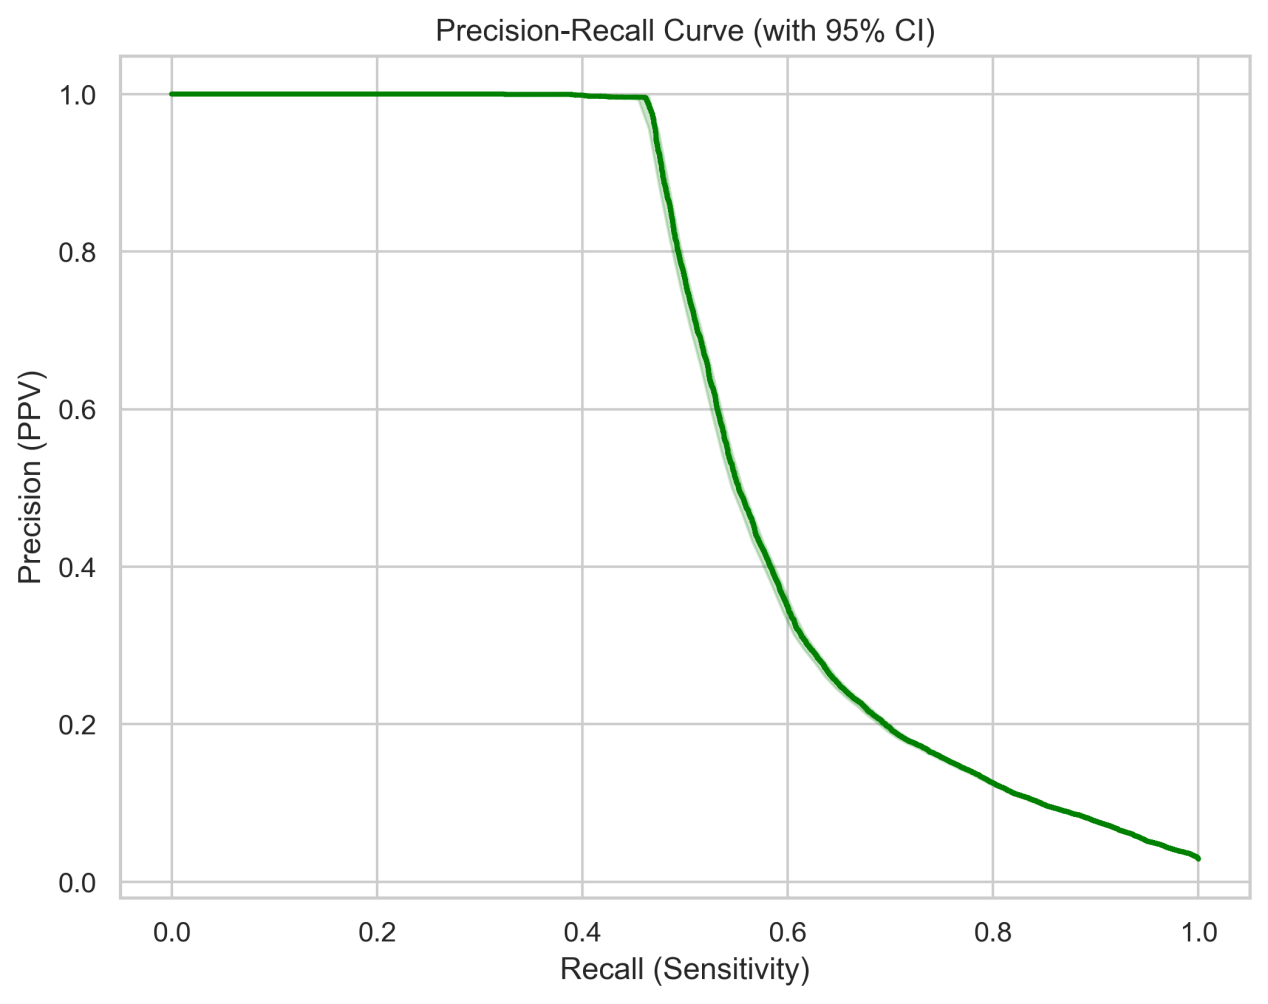

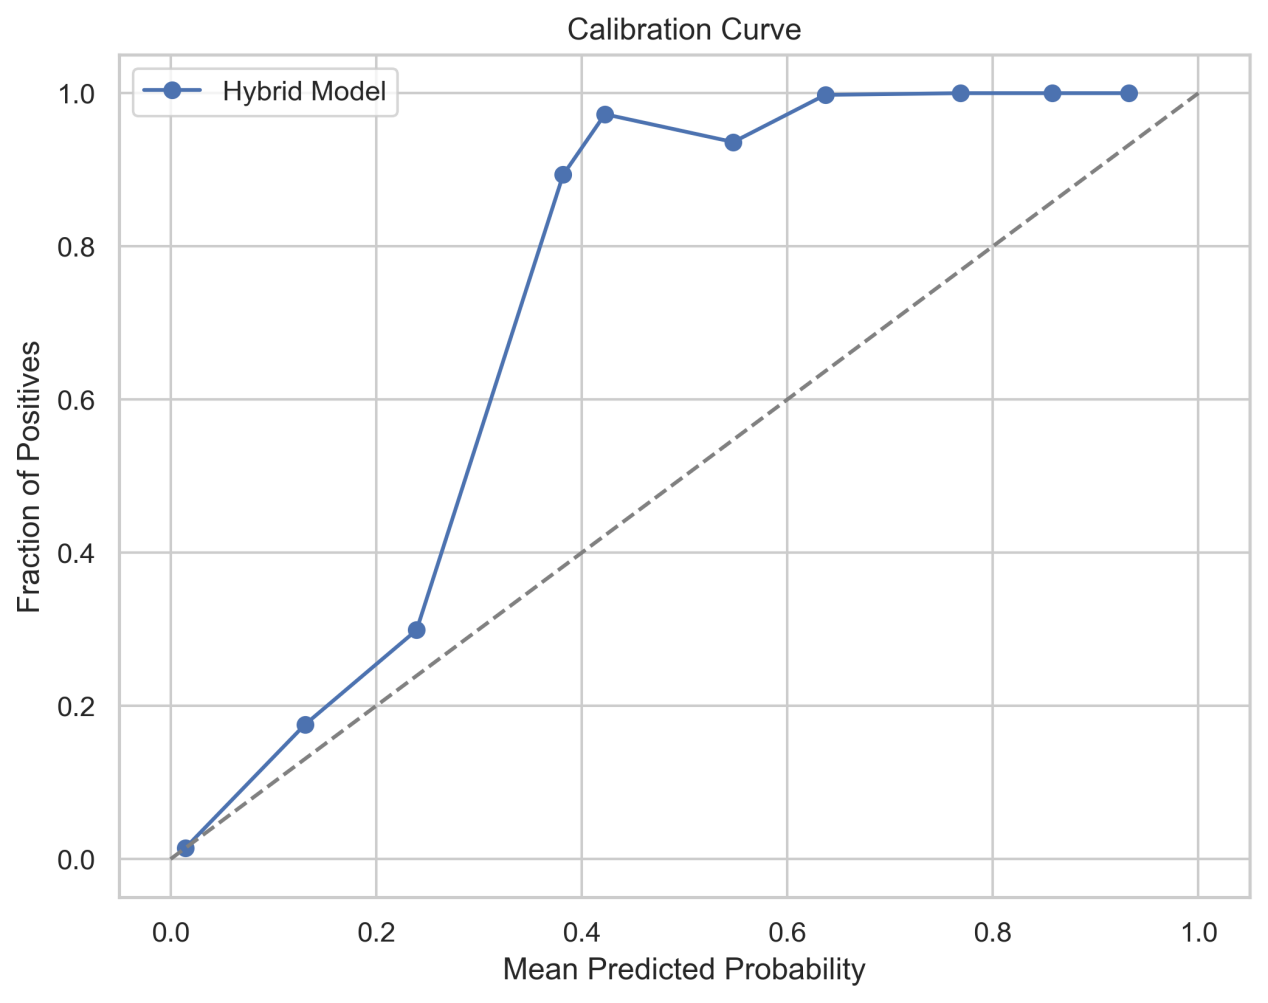

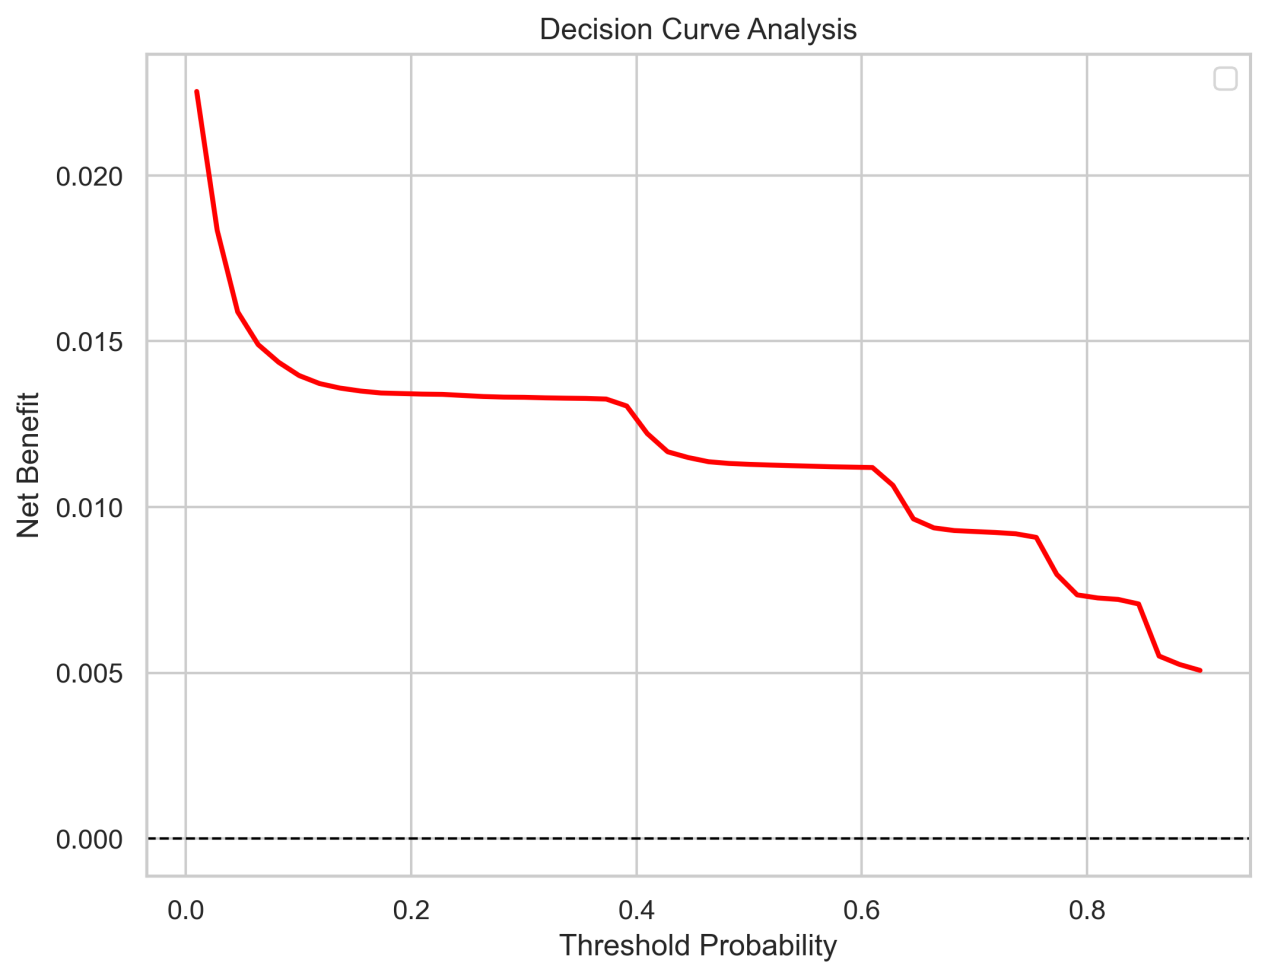

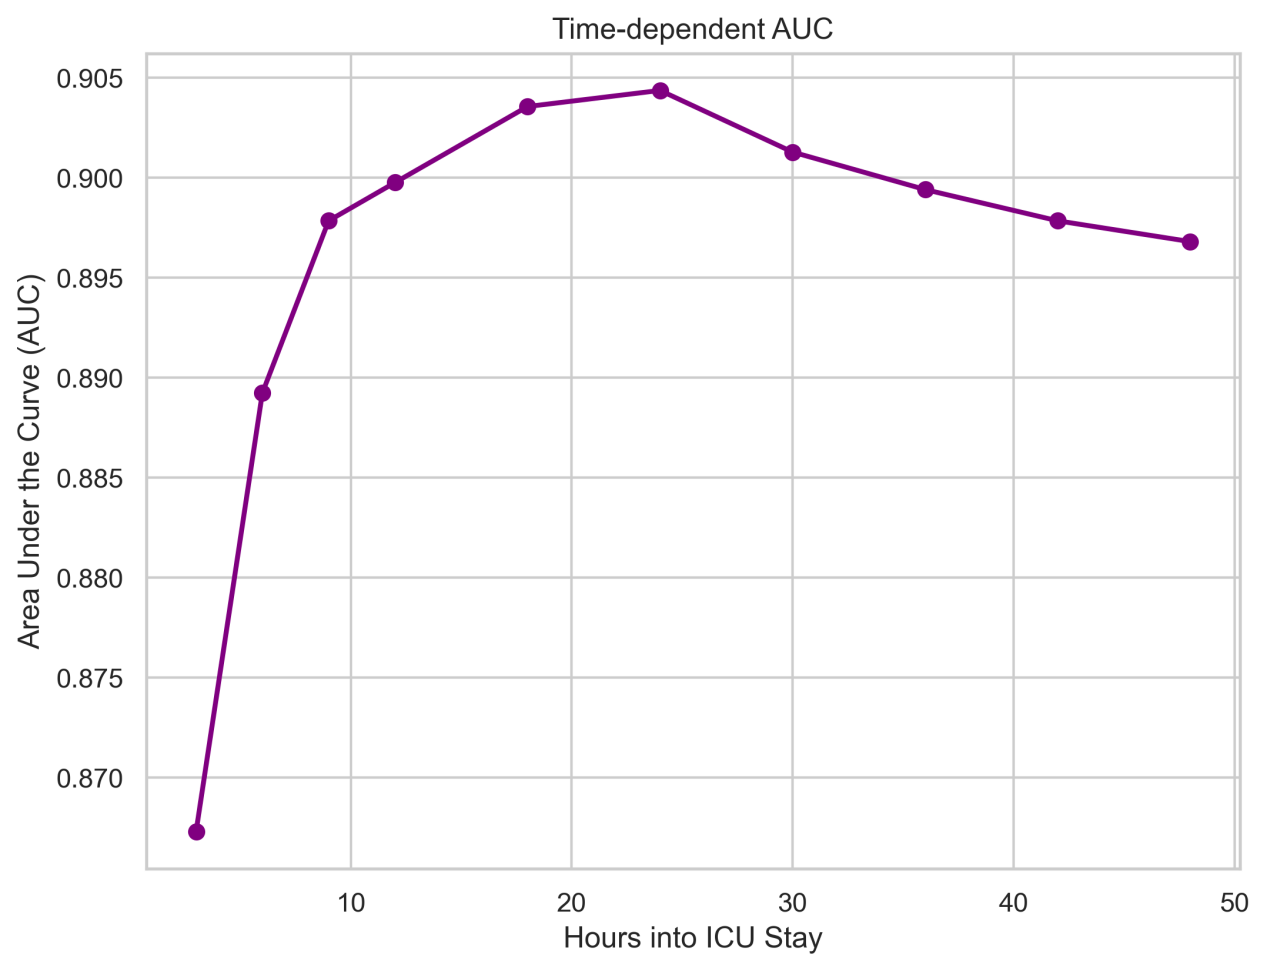

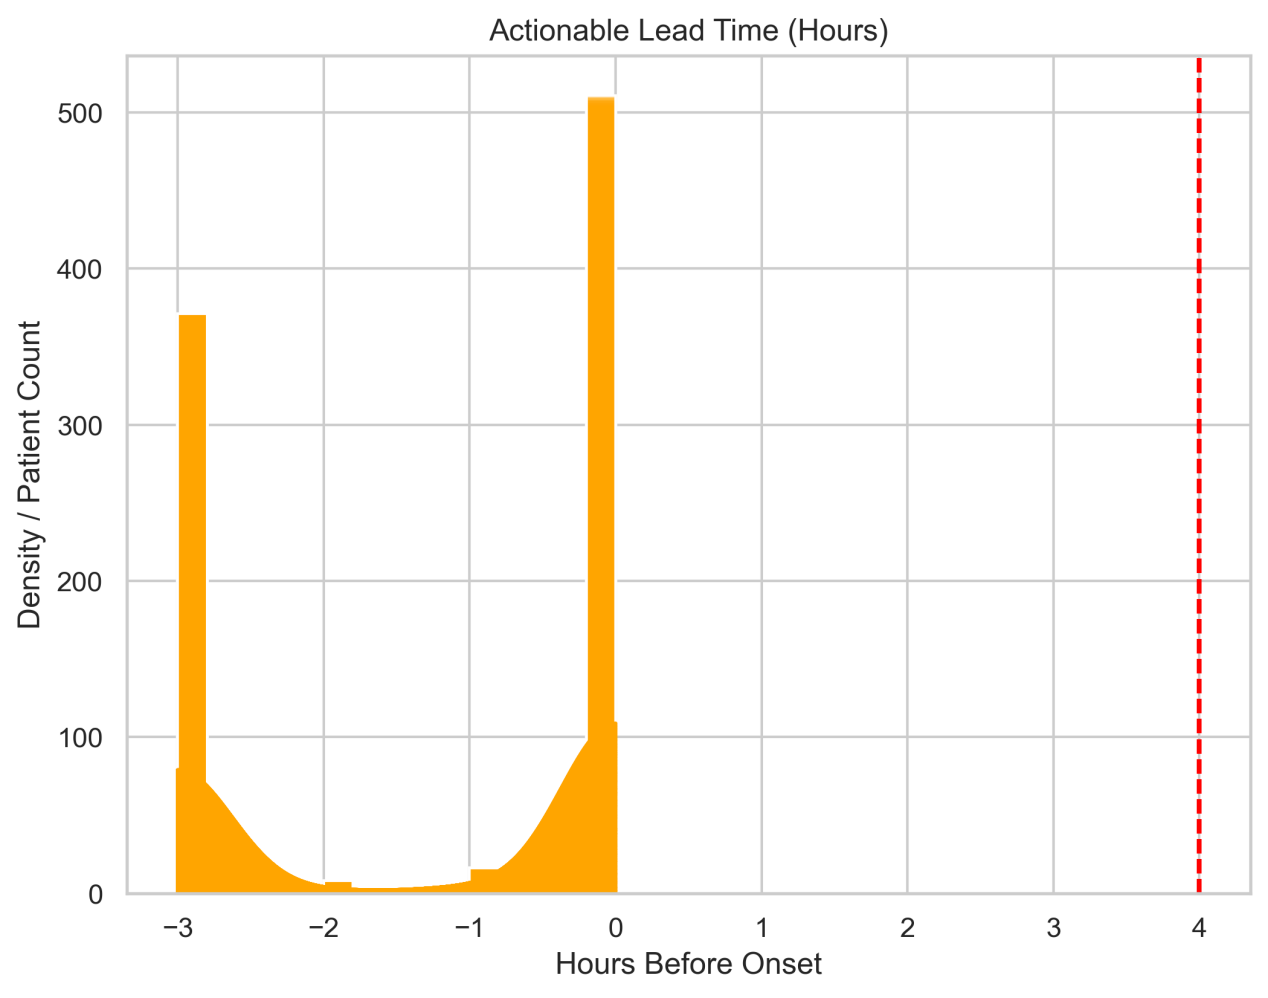

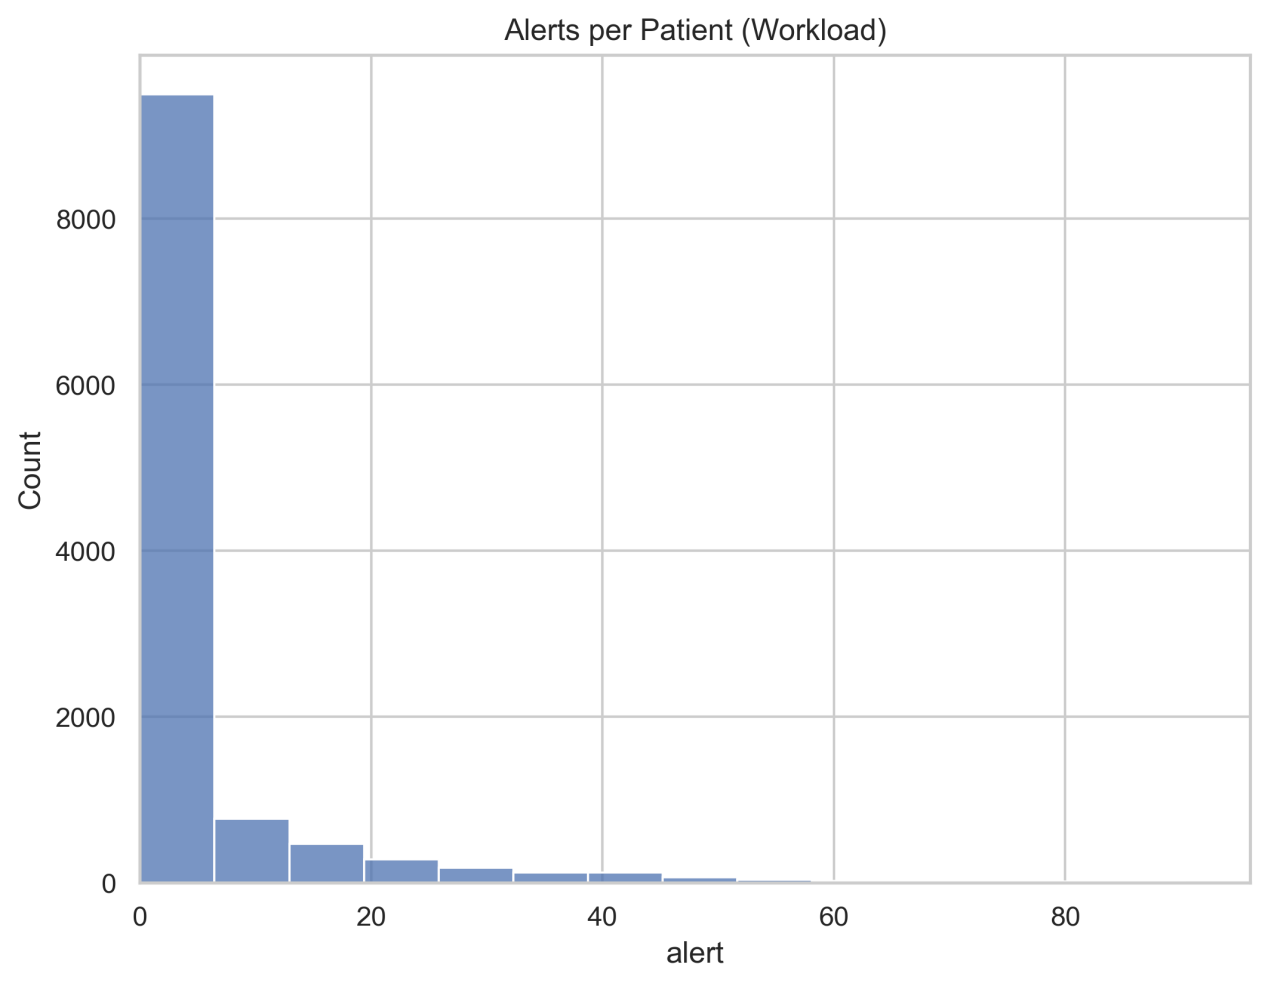

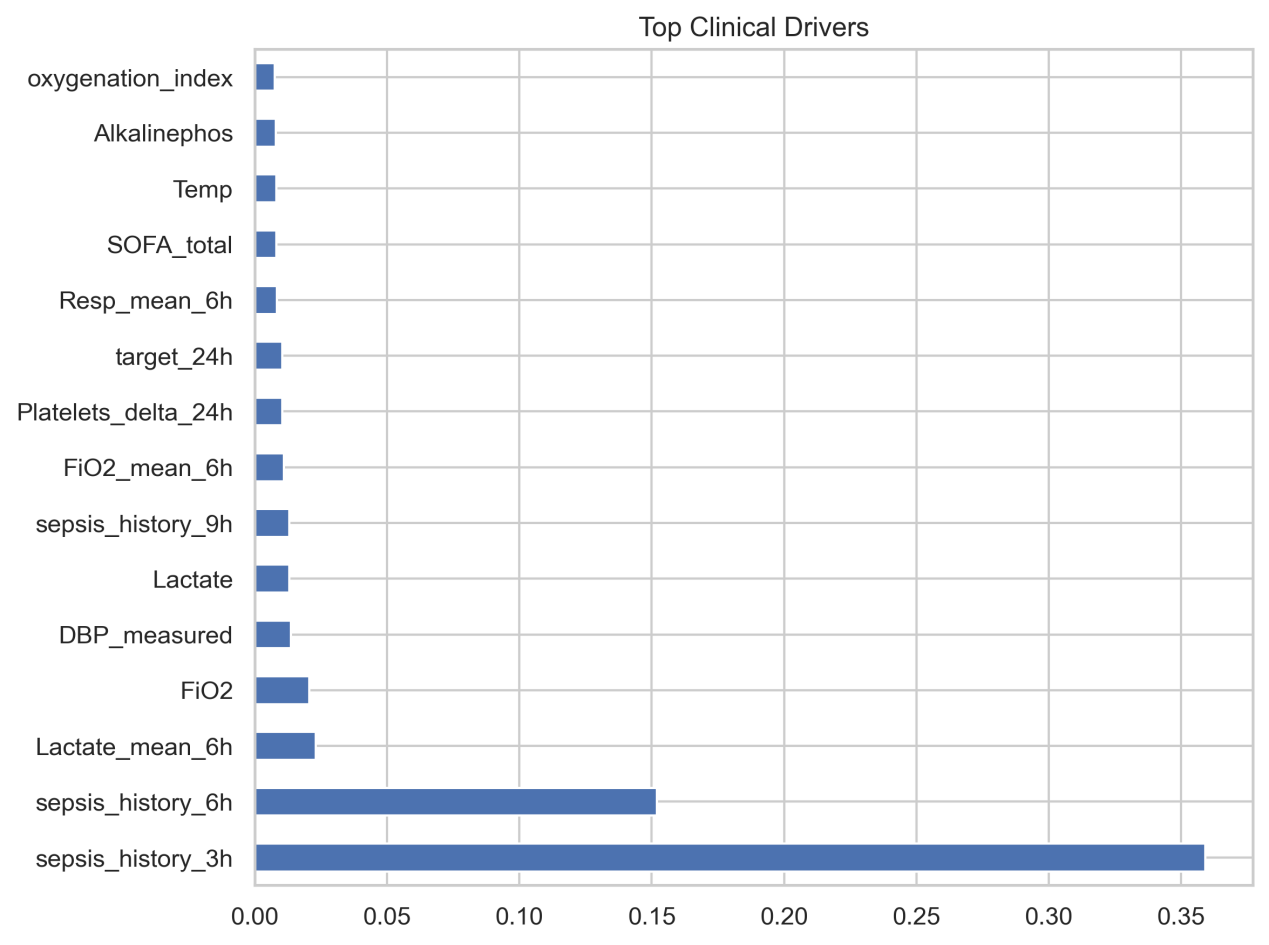

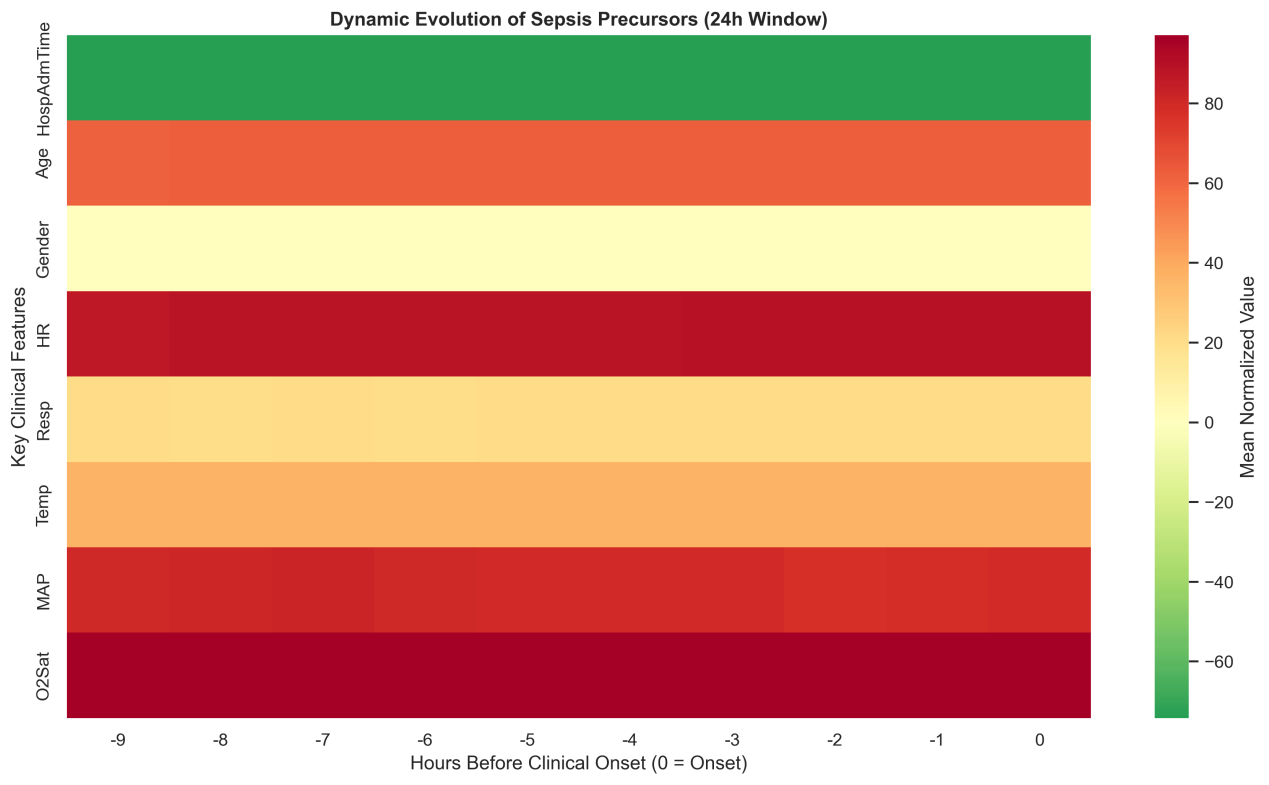

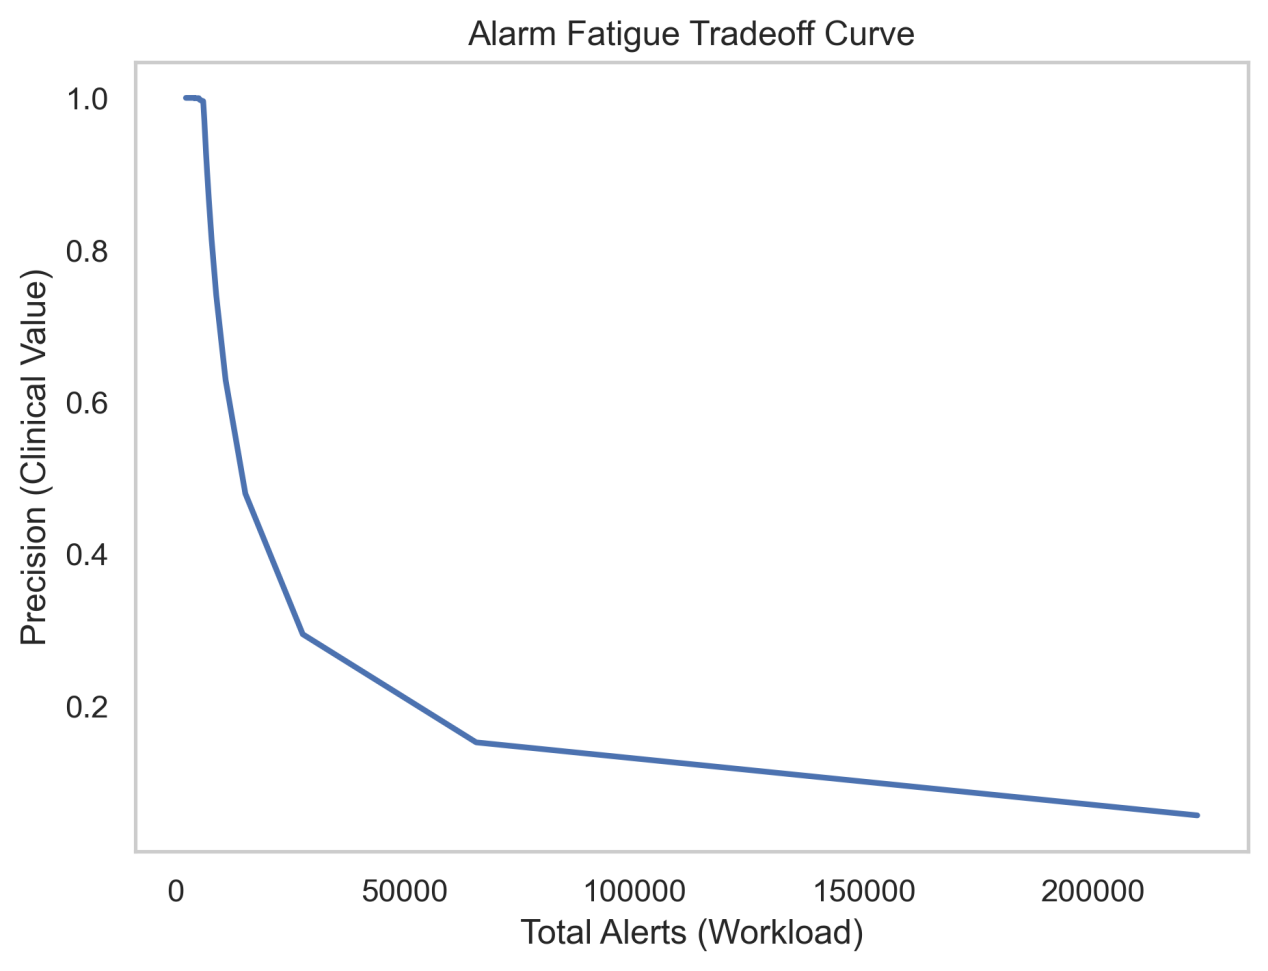

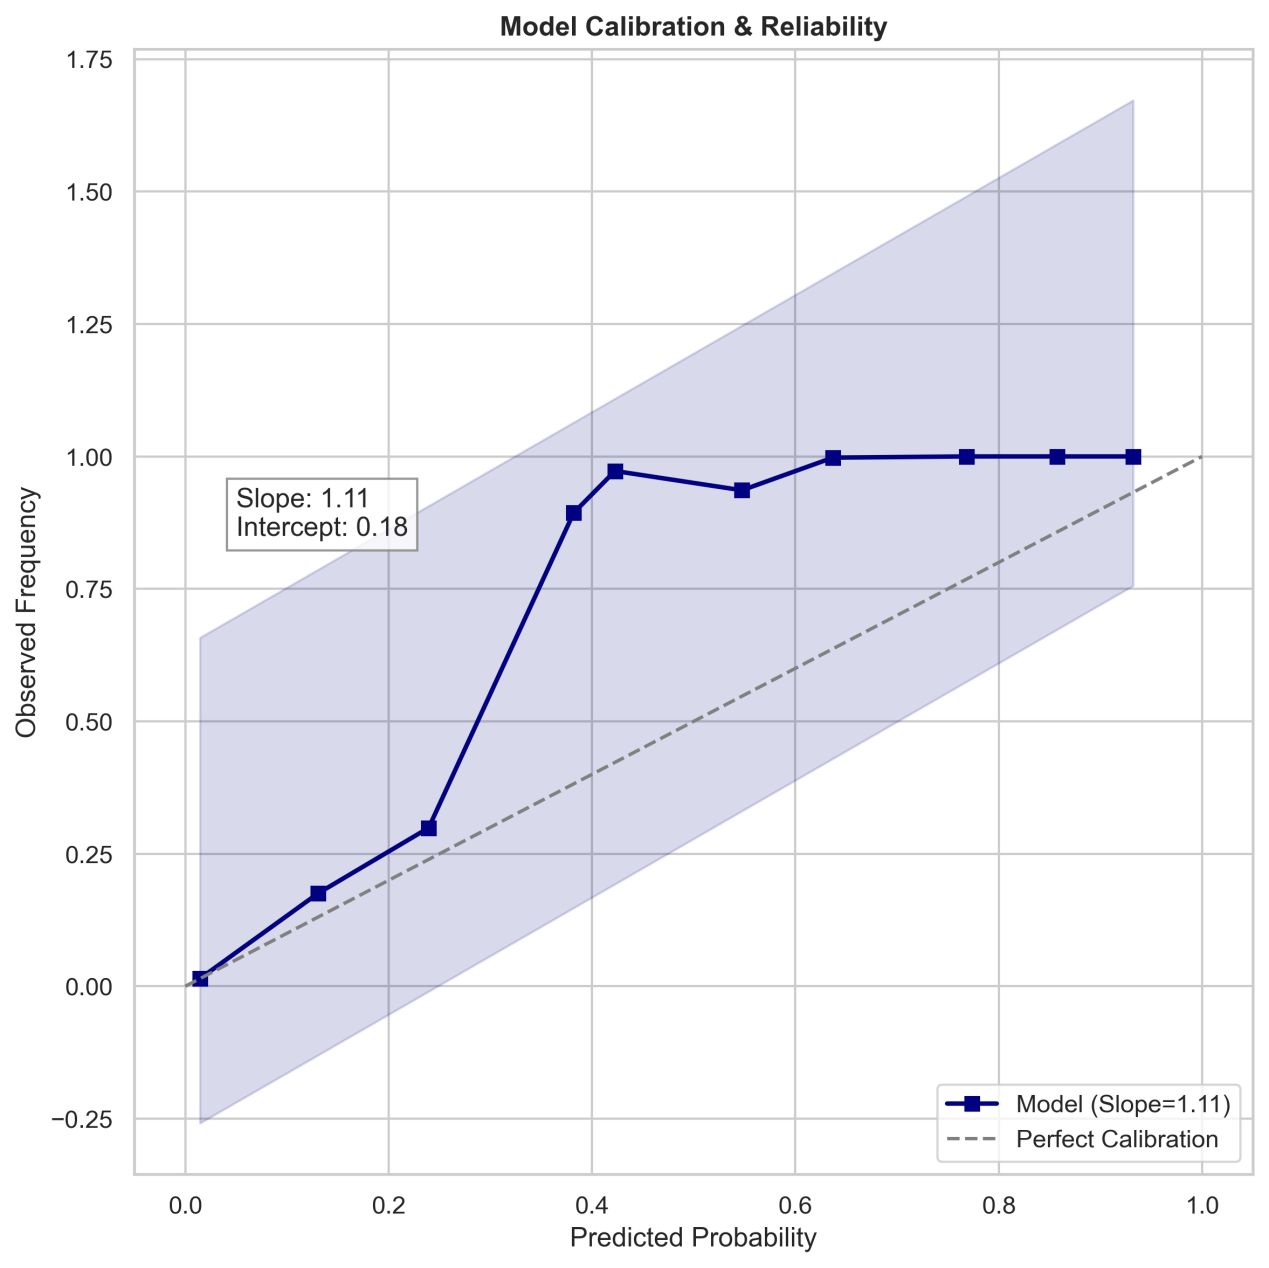

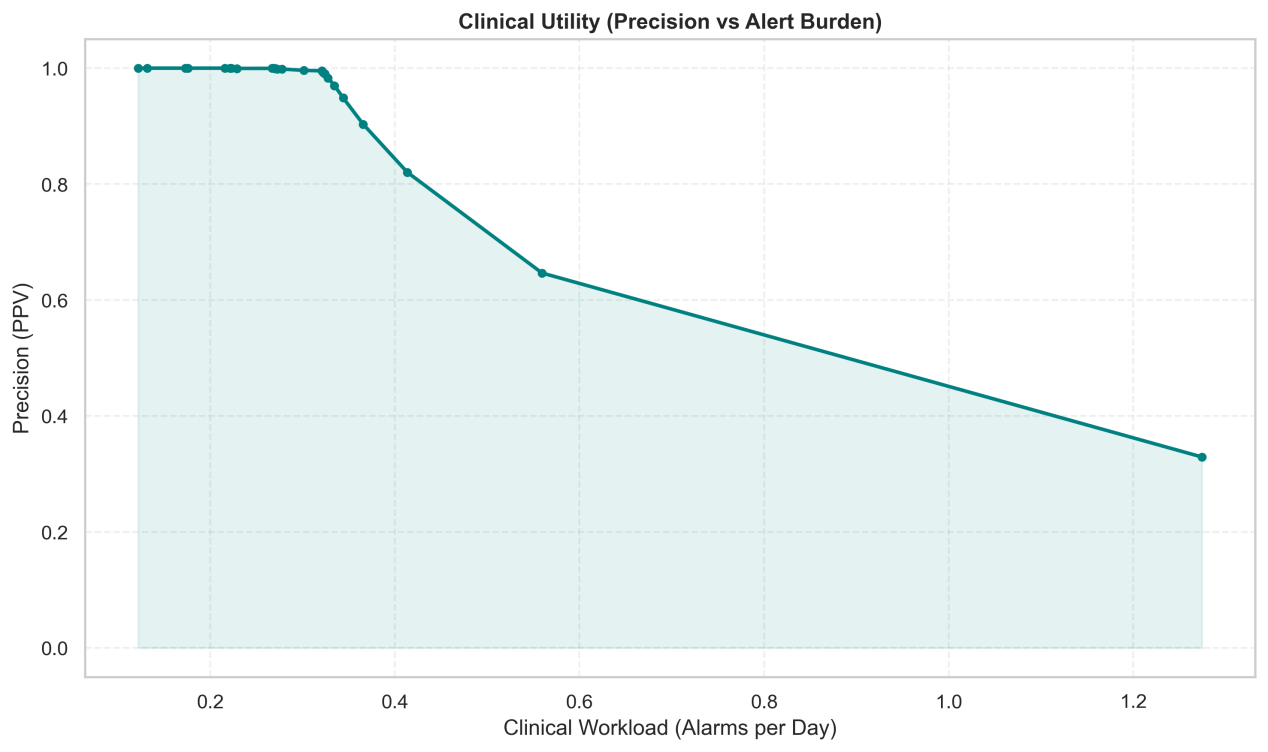

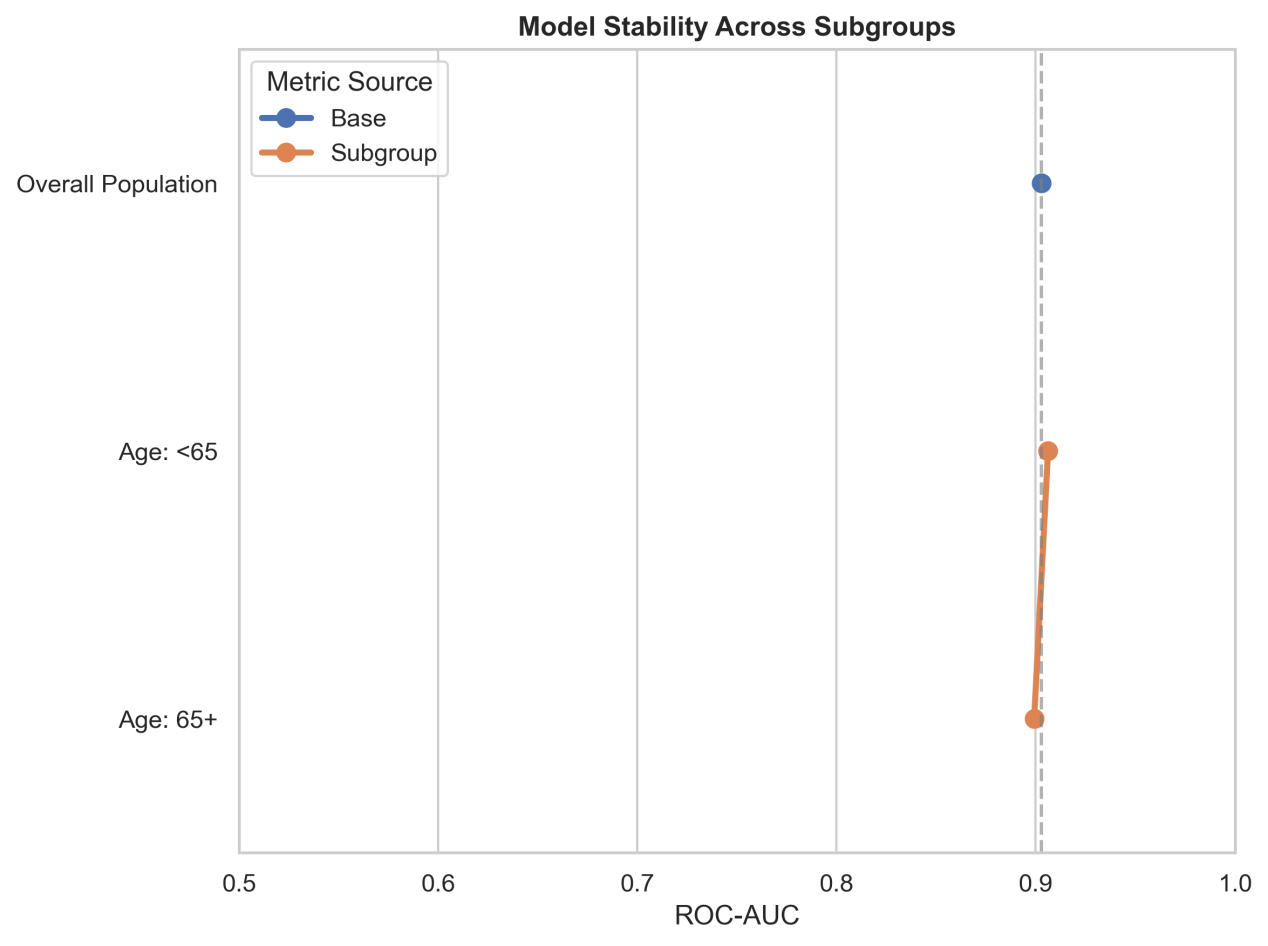


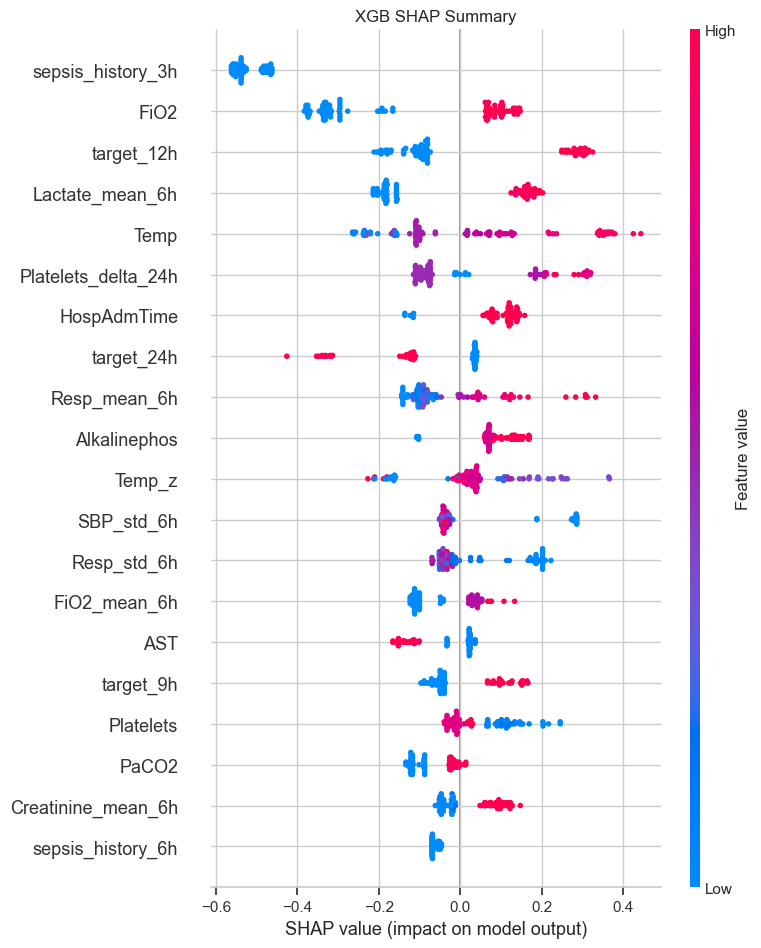


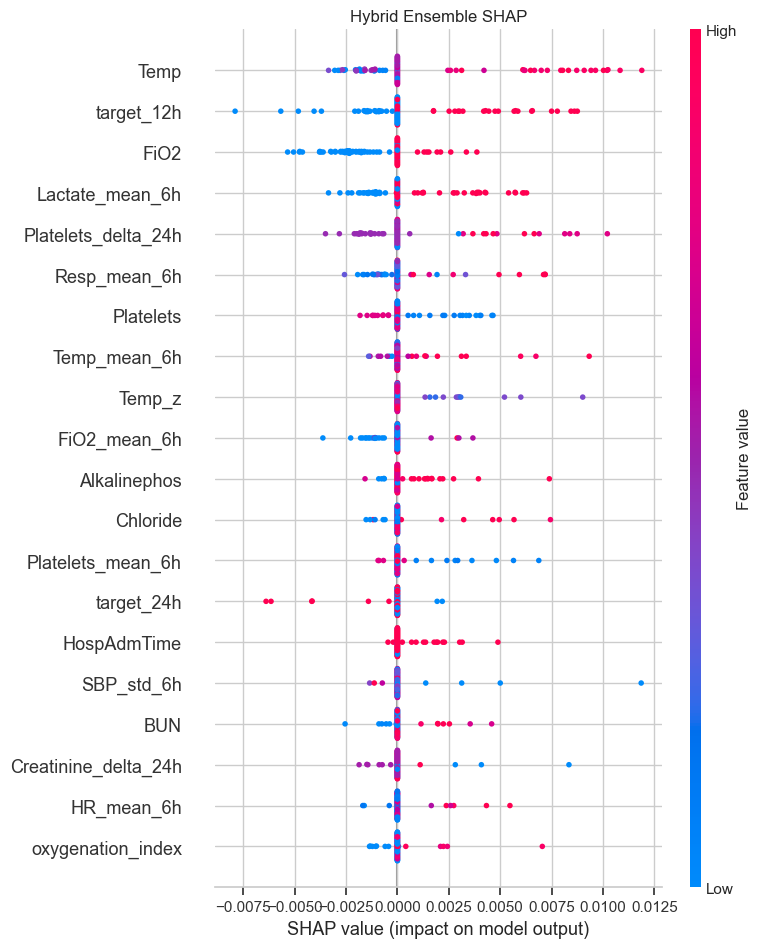


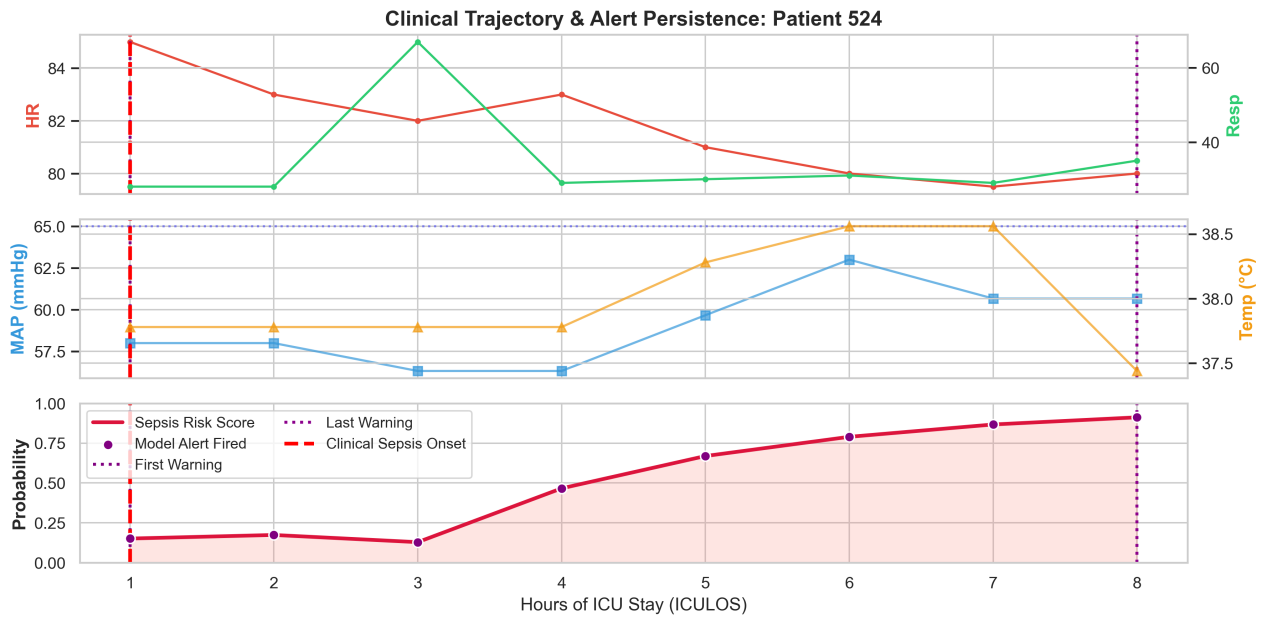

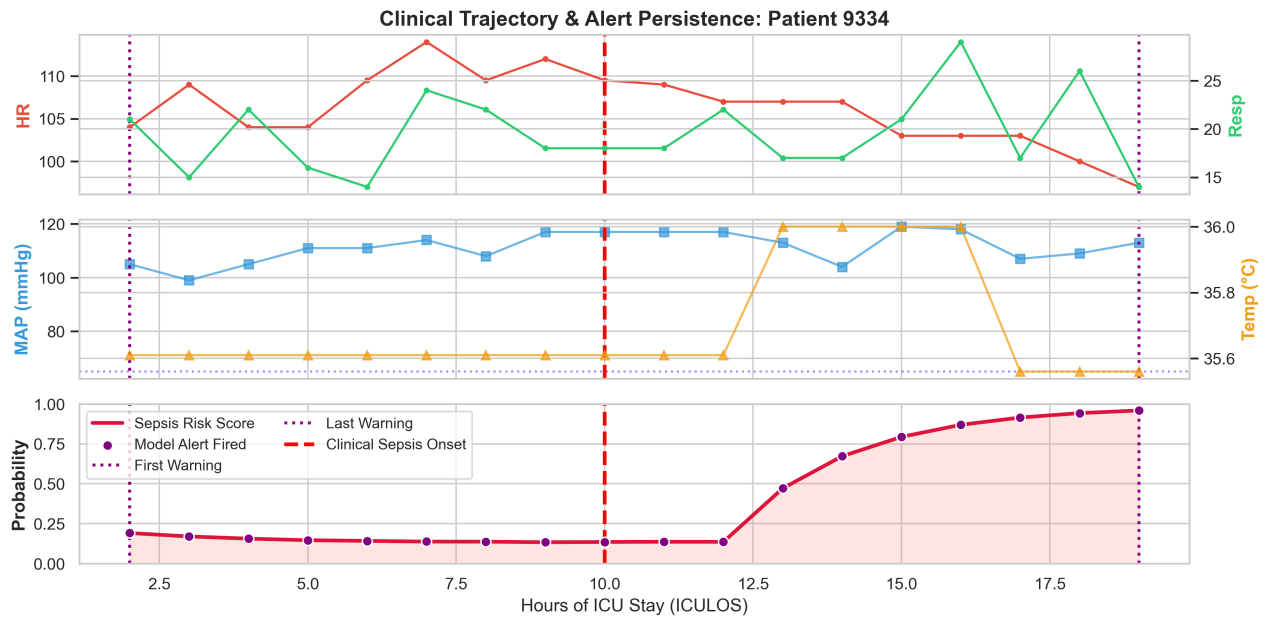

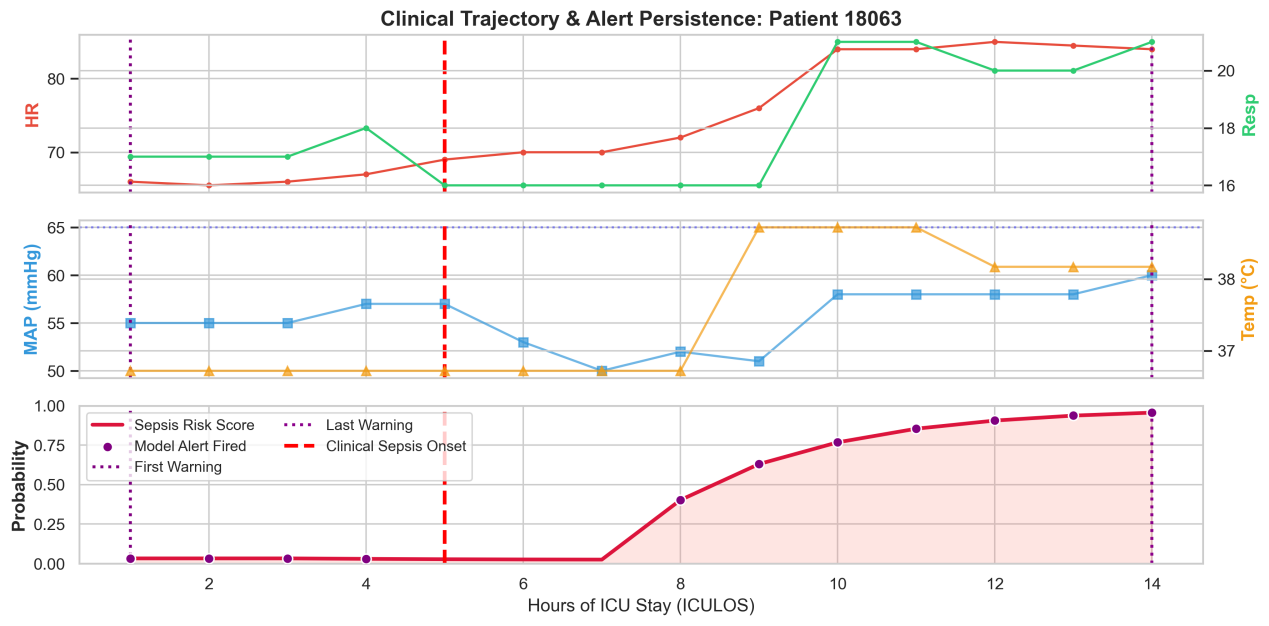

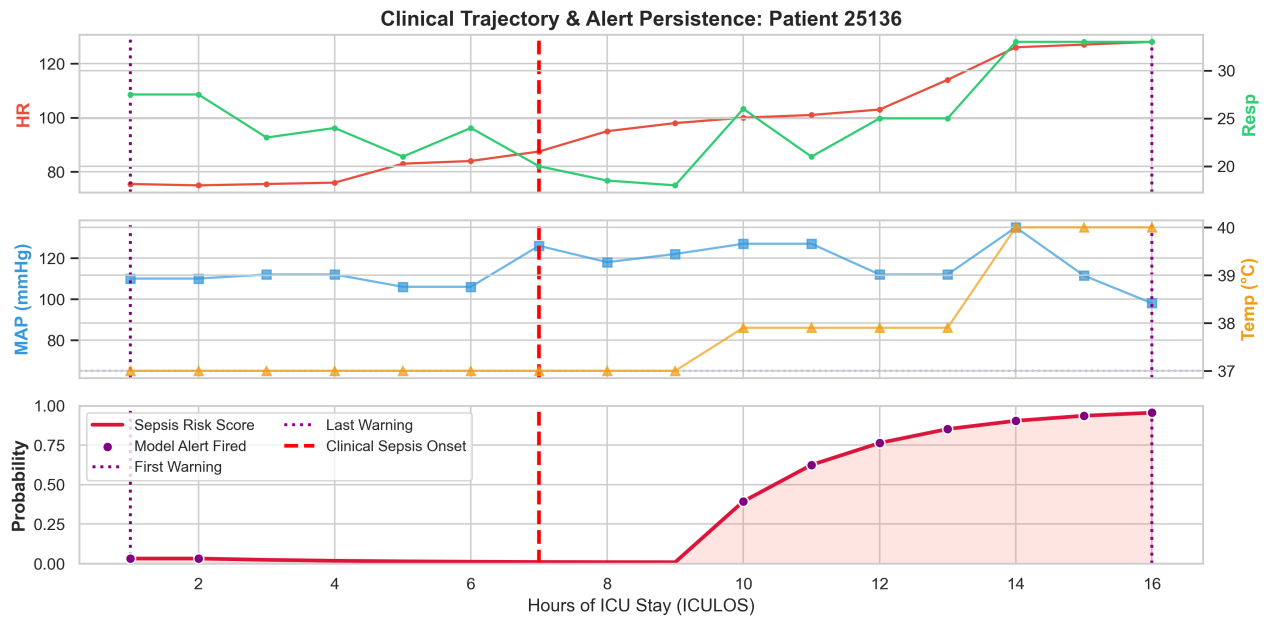

Supplement: Supplementary file 2 [file 034f421e84698bdb7db4b589.docx]
