# Supplementary material
Source: Research Square preprint supplement (doi:10.21203/rs.3.rs-10309995/v1)
Supplement: Supplementary file 1 [file 022f0dfcf17ef98fed85b630.docx]

**Hybrid Explainable AI for Early Sepsis Prediction with Actionable Lead Time and Clinical Utility Validation**

**Keya Dobriyal**

## ****PhysioNet Dataset Preparation – Process Summary****

### ****1. Data Ingestion & Merging****

- Raw data is loaded from **PhysioNet 2019 Challenge datasets (training_setA & training_setB)**.
- All .psv files are read and **merged into a single master dataframe**.
- A **unique** Patient_ID is assigned to each file to maintain patient-level tracking.

### ****2. Initial Data Audit & Missingness Analysis****

- Feature-wise and patient-wise **missing data percentages** are computed.
- Visualization of sparsity helps identify **highly missing variables (>90–95%)**.
- Temporal missingness patterns are analyzed relative to **sepsis onset time**.

----------------------------------------

PATIENT-LEVEL MISSING DATA STATISTICS

----------------------------------------

Total Patients : 40,336

Mean Missingness (%) : 77.65%

Median Missingness (%) : 77.55%

Std Deviation (%) : 5.34%

Min Missingness (%) : 43.10%

Patients with >90% Missing : 1,353

Patients with >75% Missing : 29,674

Patients with <25% Missing : 0


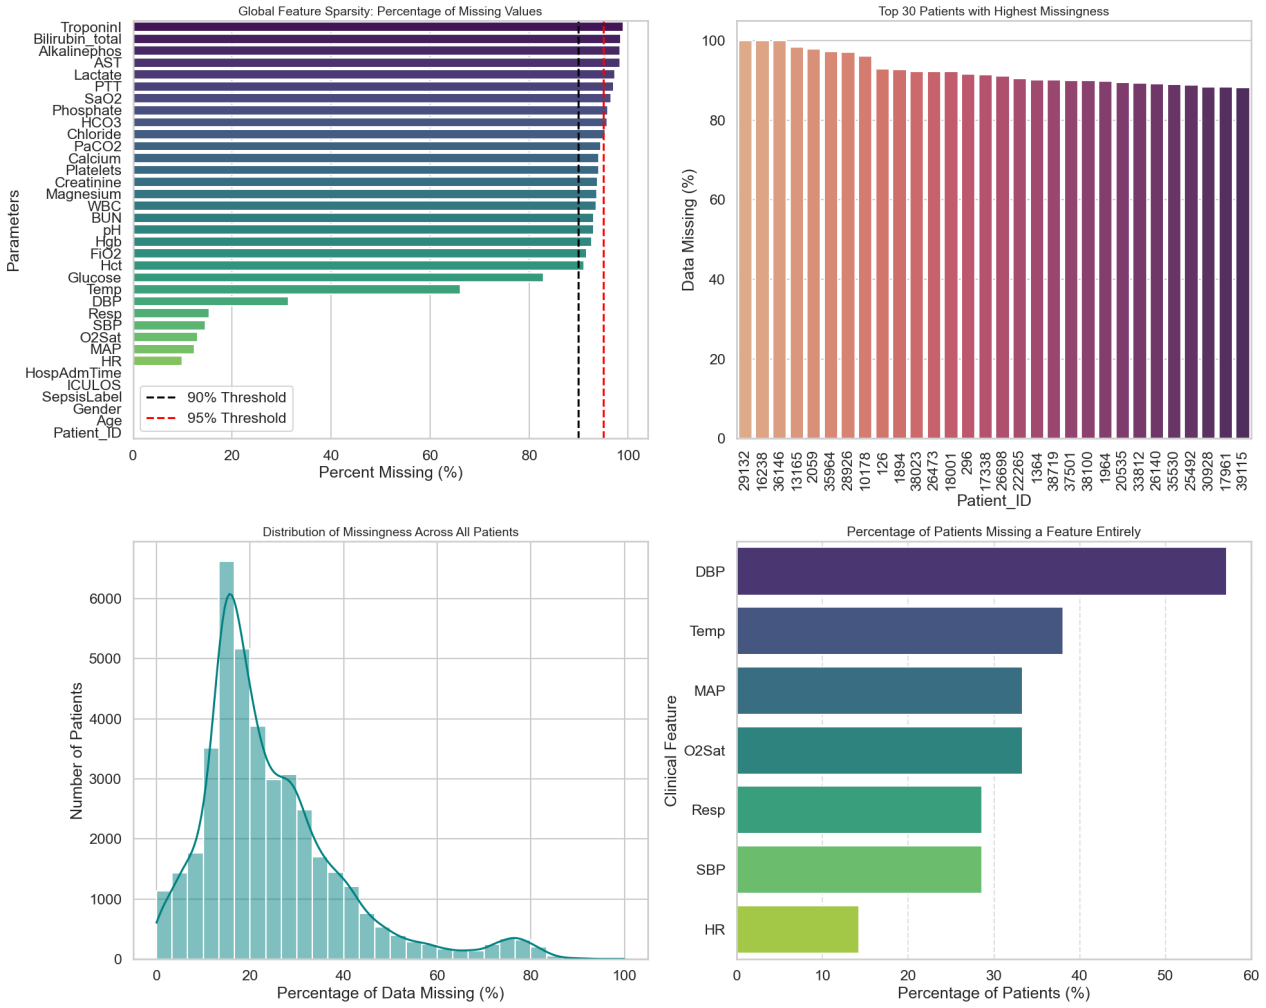


### ****3. Patient Filtering (Data Quality Control)****

- Patients with **>90% missing clinical data** are removed.
- Ensures dataset reliability and reduces noise from sparsely recorded patients.

----------------------------------------

DATA CLEANING SUMMARY: HIGH MISSINGNESS

----------------------------------------

Total Patients Initially : 40,336

Patients to Exclude (> 90%) : 1,353

Remaining Patients : 38,983

----------------------------------------

### ****4. Clinical Data Cleaning & Imputation****

- **Physiological imputation** applied (e.g., DBP estimated using MAP & SBP).
- **Temporal imputation**:
  - Forward fill (within patient timeline)
  - Median fill for remaining gaps
- Outliers are removed using **clinical thresholds** (e.g., HR <20 or >250).

### ****5. Measurement Awareness Engineering****

- Binary **“_measured” flags** created for each variable.
- Captures whether a lab/vital was recorded, improving model interpretability.

### ****6. Temporal Structuring****

- Data sorted by **Patient_ID and ICU length of stay (ICULOS)**.
- Enables **time-series consistency** and downstream temporal modeling.

### ****7. Feature Engineering****

- Clinical indices derived:
  - Shock Index = HR / SBP
  - Pulse Pressure = SBP − DBP
  - SpO₂/HR ratio
- Aggregation at **patient level**:
  - Mean, max, min, std, median for each variable
- Target variable created as **max SepsisLabel per patient**

### ****8. Sepsis-3 Oriented Validation Dataset Creation****

- Patients filtered using **ΔSOFA ≥ 2 (Sepsis-3 criteria)** instead of raw labels.
- A **balanced validation dataset (1:2 ratio)** is constructed:
  - Sepsis : Non-sepsis
- Designed for **robust clinical evaluation (FN/FP sensitivity)**

--------------------------------------------------

CLINICAL POPULATION SUMMARY

--------------------------------------------------

Total Unique Patients : 38,982

Patients with SOFA scores : 38,982

Max SOFA Score (Overall) : 12.0

Average Max SOFA Score : 1.91

--------------------------------------------------

Sepsis-3 Patients (ΔSOFA ≥ 2) : 8,332

Sepsis Prevalence : 21.37%

--------------------------------------------------

### ****9. Final Dataset Generation****

- Cleaned and engineered dataset (df_final) includes:
  - Clinical variables
  - Engineered features
  - Measurement flags
  - Patient-level aggregates
- Exported datasets:
  - Model-ready training data
  - Patient-level statistics for audit/analysis

----------------------------------------

PATIENT POPULATION SUMMARY

----------------------------------------

Total Unique Patients : 38,982

Total Male (1) : 21,970

Total Female (0) : 17,012

----------------------------------------

Total Patients with Sepsis : 2,920

Total Male with Sepsis : 1,733

Total Female with Sepsis : 1,187

----------------------------------------

Overall Gender Ratio (M/F) : 1.29

Sepsis Patient Ratio : 0.07

Sepsis Gender Ratio (M/F) : 1.46

----------------------------------------

Age Statistics by Gender:

| Gender | mean | median | std | min | max | count |
| --- | --- | --- | --- | --- | --- | --- |
| Female | 62.362756 | 64.745 | 17.299041 | 14.0 | 100.0 | 17012 |
| Male | 61.363181 | 63.000 | 15.801936 | 14.0 | 100.0 | 21970 |

### ****10. Exploratory Data Analysis (EDA)****

- Demographics: Age, Gender distribution
- Clinical & lab variable distributions
- Patient-level statistical summaries


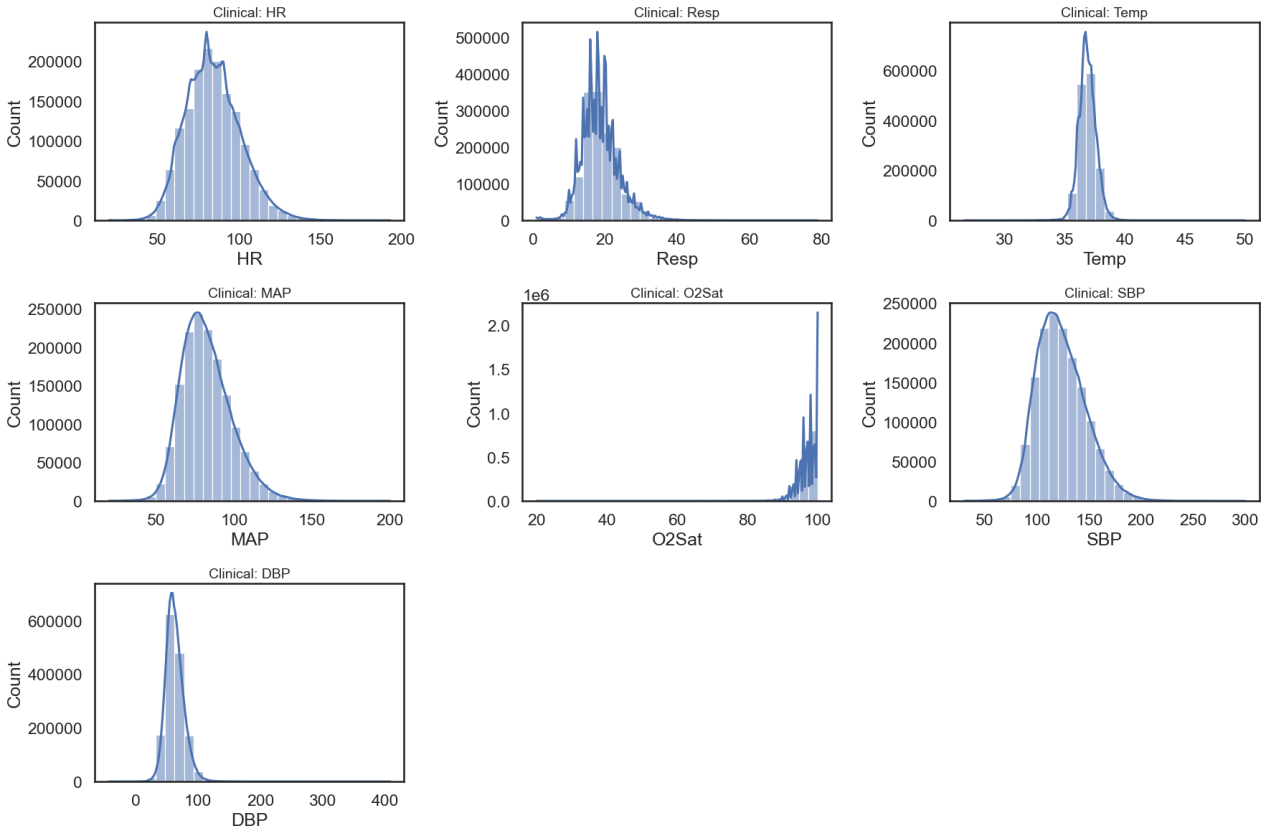


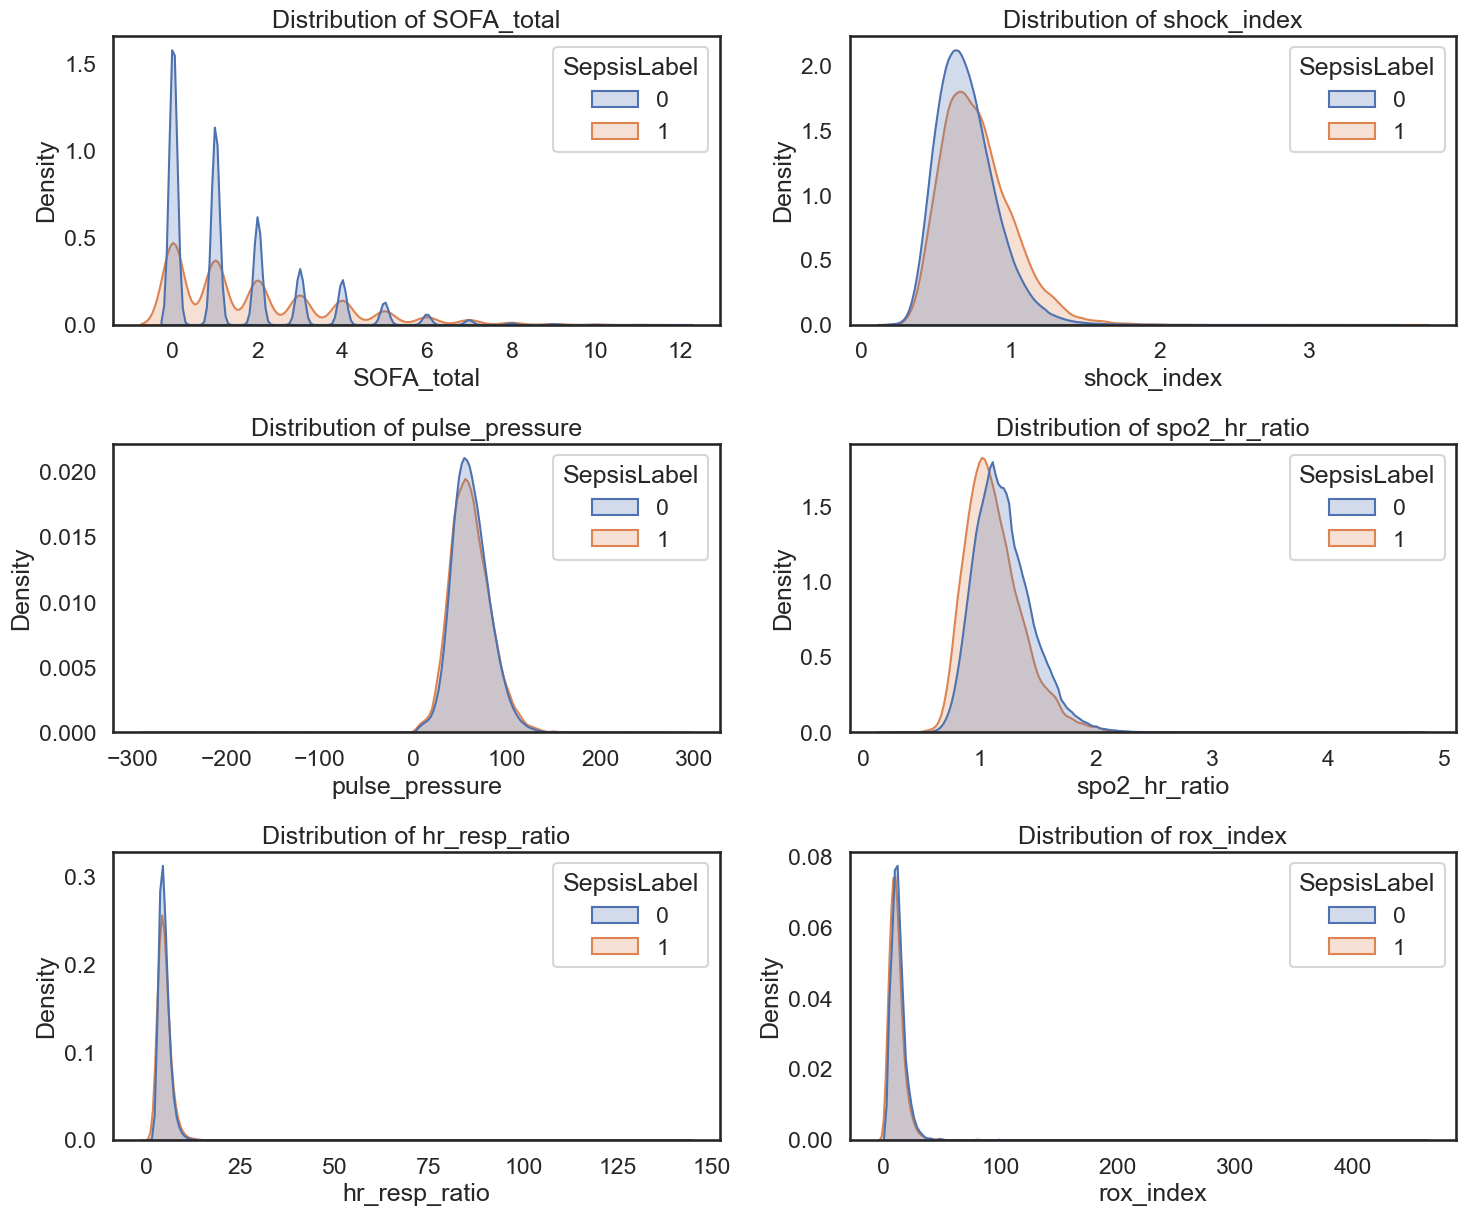


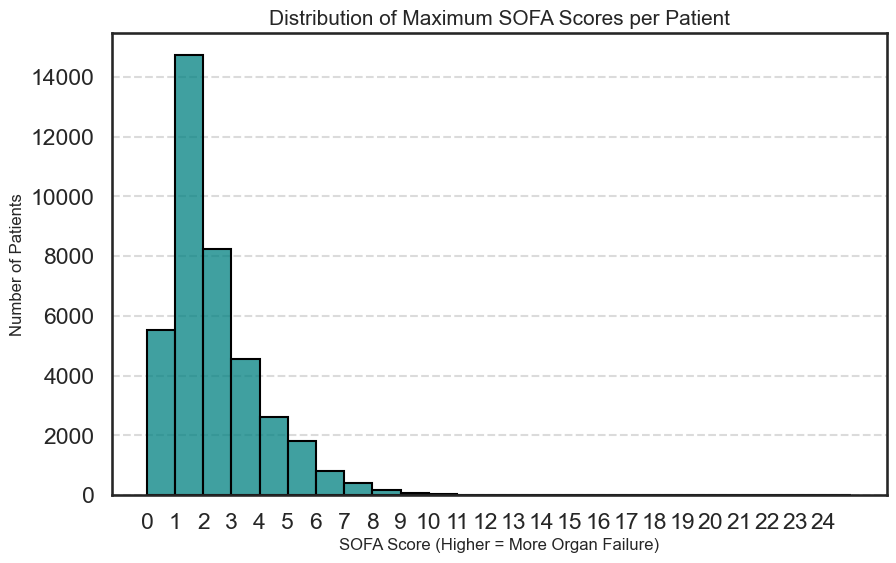


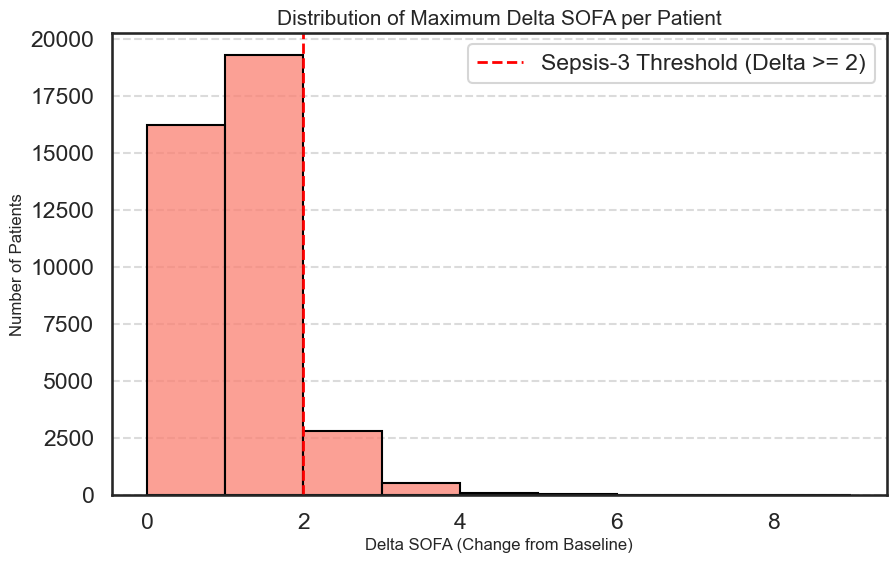


COHORT STATISTICS: SEPSIS VS NON-SEPSIS

--------------------------------------------------

Age ICULOS Gender

mean std median mean median mean

Non-Sepsis (0) 61.778269 16.487128 63.605 37.758915 39.0 0.561172

Sepsis (1) 62.060397 16.382426 64.000 59.380137 38.0 0.593493


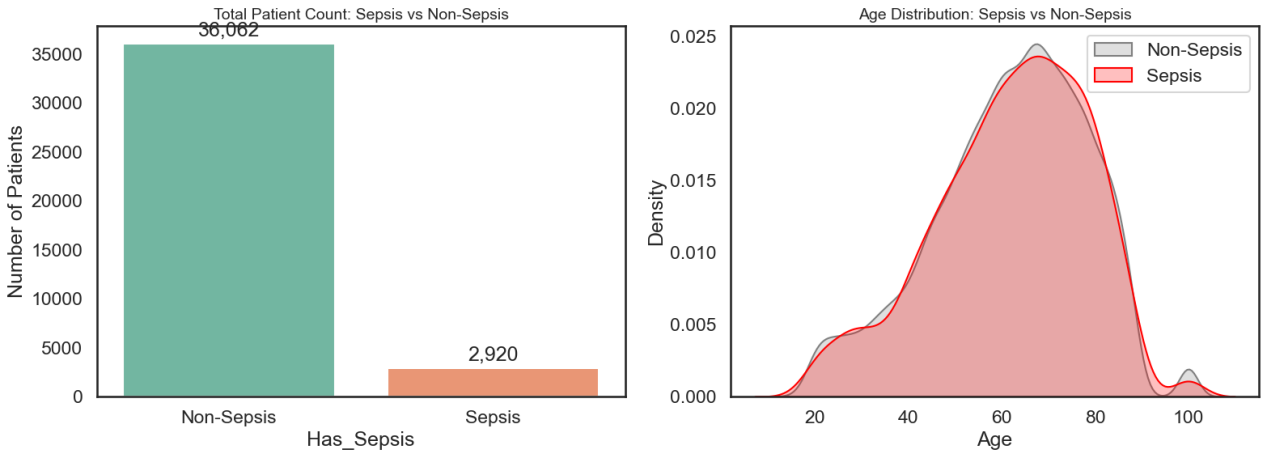


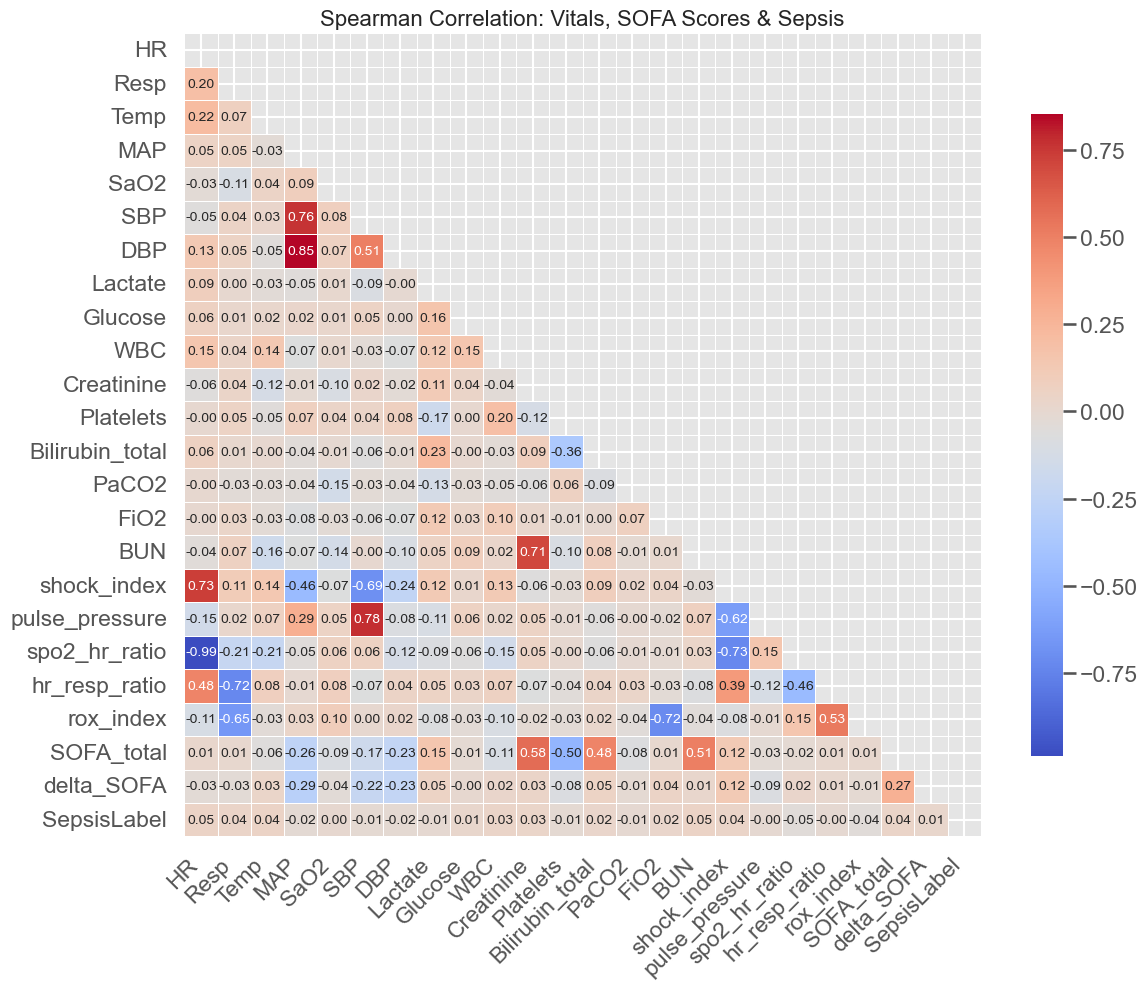


Top 15 Clinical Predictors of Sepsis:

- ICULOS: 0.063 (Positive (Increases with Sepsis))

- DBP_measured: -0.051 (Negative (Drops with Sepsis))

- FiO2_measured: 0.047 (Positive (Increases with Sepsis))

- spo2_hr_ratio: -0.046 (Negative (Drops with Sepsis))

- BUN: 0.046 (Positive (Increases with Sepsis))

- HR: 0.046 (Positive (Increases with Sepsis))

- Temp: 0.044 (Positive (Increases with Sepsis))

- rox_index: -0.042 (Negative (Drops with Sepsis))

- shock_index: 0.039 (Positive (Increases with Sepsis))

- SOFA_total: 0.038 (Positive (Increases with Sepsis))

- Resp: 0.037 (Positive (Increases with Sepsis))

- sepsis_3_criteria: 0.037 (Positive (Increases with Sepsis))

- Lactate_measured: 0.036 (Positive (Increases with Sepsis))

- HR_measured: -0.035 (Negative (Drops with Sepsis))

- SOFA_baseline: 0.034 (Positive (Increases with Sepsis))


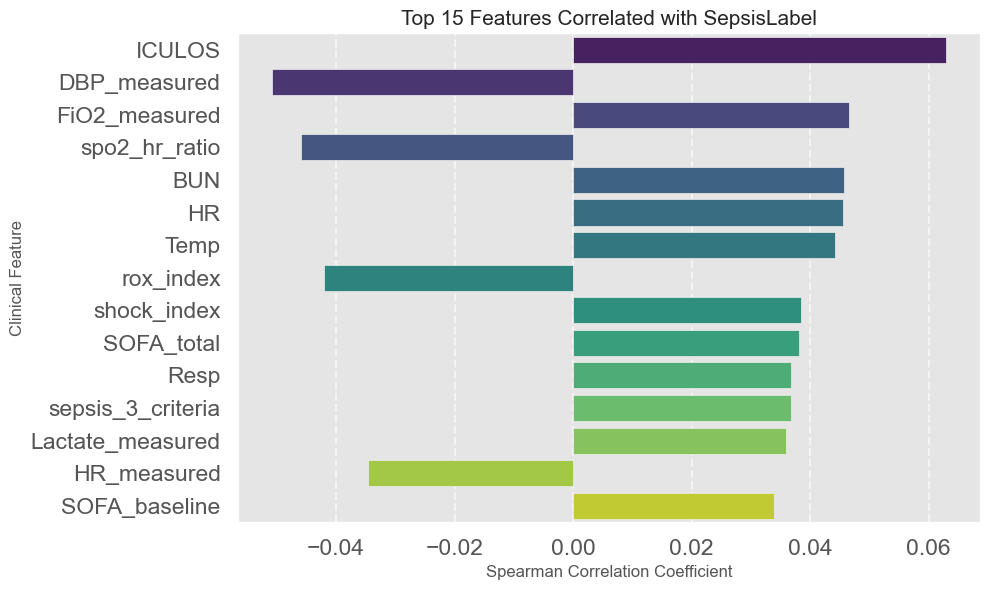


## ****Key Outcome****

A **clinically cleaned, temporally consistent, feature-rich dataset** aligned with **Sepsis-3 definitions**, ready for:

- Machine learning modeling
- Early prediction systems
- Clinical validation
