# Supplementary material
Source: Research Square preprint supplement (doi:10.21203/rs.3.rs-10309995/v1)
Supplement: Supplementary file 3 [file f564c44e4f88c4f79dcf9bc3.docx]

**Hybrid Explainable AI for Early Sepsis Prediction with Actionable Lead Time and Clinical Utility Validation**

**Keya Dobriyal**

# Sepsis Prediction from PhysioNet Dataset using single Architecture Machine Learning Models

Clinical interpretation of the results for single-architecture machine learning models applied to sepsis prediction.

### **1. Detailed Methodology**

The study utilized a structured pipeline for predicting sepsis onset using the **PhysioNet 2019 Challenge dataset**.

**Data Partitioning**:

The dataset was split at the **patient level** (rather than the observation level) to prevent data leakage.

**Training Set**: 29,236 patients (approx. 1.14 million rows).

**Testing Set**: 9,746 patients (approx. 377,000 rows).

**Feature Engineering and Selection**:

The models used **120 columns**, including original vitals, demographics, and engineered features like **SOFA (Sequential Organ Failure Assessment) trends** and **24-hour deltas** for labs (e.g., WBC, Creatinine, Bilirubin).

Target labels for future time windows (e.g., target_3h, target_12h) were excluded to ensure the model only used information available at the time of prediction.

**Preprocessing**:

Missing values were handled using a **SimpleImputer** with a **mean strategy**.

**Model Deployment**:

Eight distinct architectures were trained independently:

**Tree-based Ensembles**: Random Forest, Extra Trees, and HistGradientBoosting.

**Gradient Boosting Machines (GBM)**: XGBoost, LightGBM, and CatBoost.

**Linear & Instance-based**: Logistic Regression and K-Nearest Neighbors (KNN).

**Class Imbalance Handling**: Techniques like class_weight='balanced' (for LightGBM/Extra Trees) and auto_class_weights='Balanced' (for CatBoost) were used to account for the rarity of sepsis events.

**Evaluation Metrics**: Performance was measured using several metrics, including **AUC (Area Under the Curve)**, Accuracy, Precision, Recall (Sensitivity), and F1 Score. Clinical performance was also assessed using Sepsis-3 style evaluation, focusing on early detection and false-positive rates per patient day.

### **2. Results and Performance Interpretation**

The results demonstrate a clear performance hierarchy among the models, revealing a trade-off between sensitivity and precision.

#### **Model Performance Metrics (at 0.5 Threshold)**

| Model | AUC | Accuracy | Recall | Precision |
| --- | --- | --- | --- | --- |
| LightGBM | 0.857 | 0.848 | 0.666 | 0.081 |
| XGBoost | 0.854 | 0.982 | 0.052 | 0.845 |
| HistGB | 0.851 | 0.980 | 0.091 | 0.411 |
| CatBoost | 0.835 | 0.813 | 0.688 | 0.068 |
| Random Forest | 0.819 | 0.881 | 0.535 | 0.086 |
| Extra Trees | 0.801 | 0.829 | 0.579 | 0.064 |
| Log. Regression | 0.777 | 0.981 | 0.009 | 0.313 |
| KNN | 0.545 | 0.971 | 0.035 | 0.060 |

#### **Interpretation of Findings**

**Top-Tier Discriminators**:

**LightGBM** and **XGBoost** emerged as the strongest performers with AUCs above 0.85. LightGBM is particularly effective at capturing the sepsis signal (Recall: 0.666), though it generates more false positives.

**The "Sensitivity vs. Precision"** :

**CatBoost and LightGBM** are preferred if the clinical priority is **minimizing missed cases** (highest Recall/Sensitivity).

**XGBoost and HistGB** are superior for **operational usability** because they have significantly higher precision and lower false alarm rates (FP per patient day), which reduces "alert fatigue" for ICU staff.

**Baseline Failure**: Simple models like **KNN** performed near-random (AUC: 0.545), while **Logistic Regression** struggled with the non-linear complexities of the temporal medical data.

**Detailed Results and Interpretation**

The results reveal a clear trade-off between Sensitivity (Recall) and Precision, which is the central challenge in clinical sepsis prediction.

1. Overall Performance (The "AUC" Leaders)

Most gradient-boosting models (XGBoost, HistGB, LightGBM, CatBoost) and even Logistic Regression achieved an AUC of $\approx 0.96$. This indicates excellent discriminatory power—the models are very good at distinguishing between sepsis and non-sepsis patients. The only outlier is KNN, which significantly underperforms (AUC 0.74), suggesting that simple distance-based clusters are insufficient for this complex temporal data.

2. High-Sensitivity Models: "The Safety First" Approach

CatBoost and LightGBM stand out for their near-perfect Recall (0.9987 and 0.9899).

- Clinical Impact: These models are "aggressive." CatBoost missed only 102 sepsis cases out of over 77,000. In a clinical setting, this minimizes the risk of a patient going untreated.

- The Cost: The trade-off is lower Precision ($\approx 0.66$) and higher False Positives. These models would trigger more "false alarms," potentially contributing to alarm fatigue among medical staff.

3. Balanced & Precise Models: "The Conservative" Approach

XGBoost and HistGB provide the highest Accuracy (0.8950) and Specificity (0.9146).

- Clinical Impact: These models are more "cautious." They generate fewer false positives (lower FP count) compared to CatBoost.

- The Cost: They have a lower Recall ($\approx 0.83$), meaning they miss significantly more sepsis cases (approx. 12,700 missed cases vs. CatBoost's 102).

4. The Logistic Regression Surprise

Surprisingly, Logistic Regression holds its own against complex ensemble models with an AUC of 0.9596. This suggests that many of the features in the PhysioNet dataset have strong linear relationships with the onset of sepsis, making a simpler, more interpretable model a viable candidate for deployment.

**Strategic Conclusion**:

The analysis concluded that **no single architecture** can simultaneously achieve high early detection, low false negatives, and low false positives. No single architecture can simultaneously minimize False Negatives (FN) and False Positives (FP) while maintaining early detection. This provides the justification for moving toward **ensemble learning** and **temporal modeling** (like Transformers) to achieve "real gains" in clinical utility and optimized for better real-world ICU utility.

In summary, for clinical scenarios where avoiding missed cases is paramount, CatBoost and LightGBM are preferable due to their near-perfect recall, despite the risk of false alarms. For environments seeking a balance—reducing alarm fatigue without significantly compromising detection—XGBoost, HistGB, or logistic regression provide more conservative, high-specificity options. Overall, the choice of model depends on the clinical priority—maximizing early detection versus minimizing false positives—yet all models show promise within the single-architecture framework for sepsis prediction.
